# Supplementary material for: Towards Unbiased Evaluation of Ionization Performance in LC-HRMS Metabolomics Method Development
Source: MDPI journal article supplement (doi:10.3390/metabo12050426), 2022-05-10
Supplement: s1 [file s1]

## Supplementary Materials

for the manuscript:

# Towards unbiased evaluation of ionization performance in LC-HRMS metabolomics method development

Carsten Jaeger and Jan Lisec

Bundesanstalt für Materialforschung und -prüfung (BAM), Department 1 Analytical Chemistry; Reference Materials, Richard-Willstätter-Straße 11, 12489 Berlin, Germany

- submitted to *Metabolites* -

## Supplementary Figures

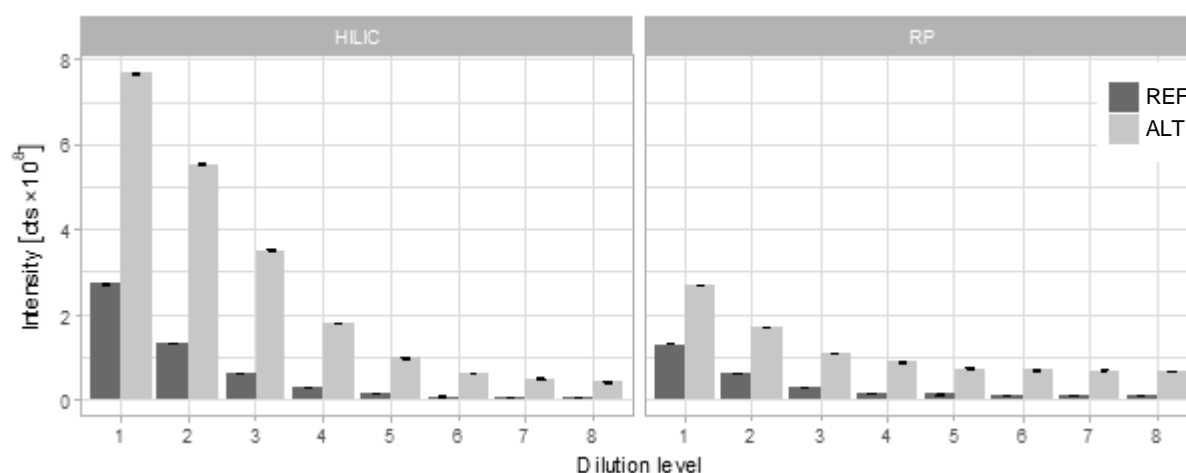

**Figure S1.** Comparison of total intensity signals measured for a biological test sample at different concentration levels using the reference (REF) and alternative (ALT) instrumental setup, respectively. Results show a large offset in sensitivity between the setups, leading to difficulties in directly comparing measurements results. Evaluation was separately carried for two chromatography modes investigated (HILIC, RPC). Bars represent mean summed base peak intensities ( $\pm$ SD) of four repeated injections.

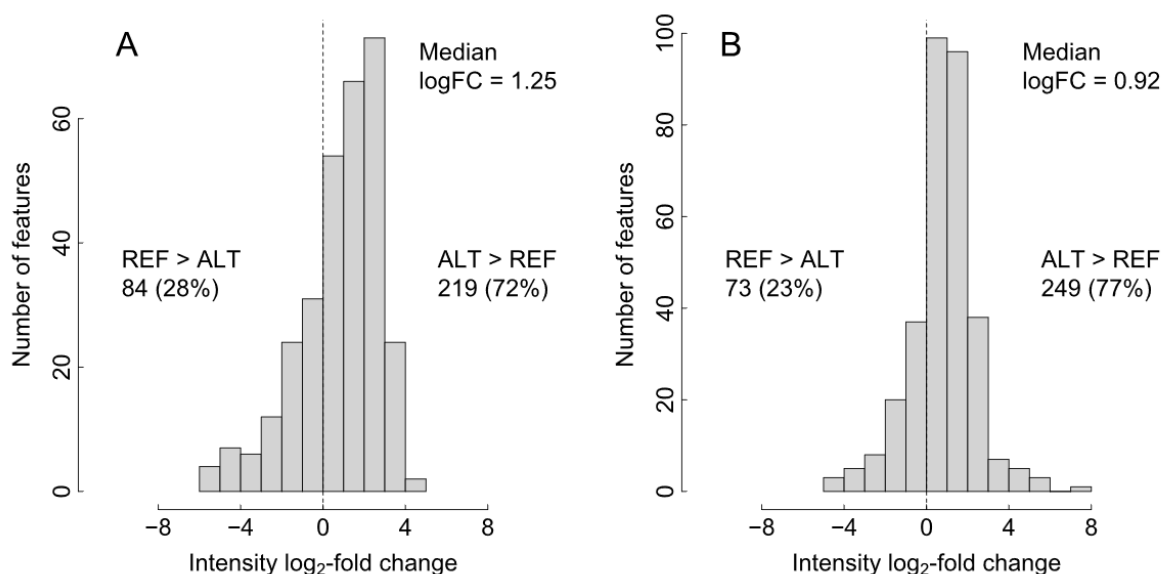

**Figure S2.** Evaluation of selectivity based on targeted data. A library of metabolite standards was analyzed by LC-HRMS using two instrumental setups (REF, ALT) and  $\log_2$ -fold changes in intensities were calculated for protonated and deprotonated molecular ion species ( $[M+H]^+$ ,  $[M-H]^-$ ), respectively. Histograms show data for the HILIC (A) and RPC (B) methods, respectively. Percentages of compounds with enhanced intensity in one of the setups are indicated beside the histograms; these refer to the total number of compounds with acceptable (symmetric) peak shapes within each method (303 for HILIC and 322 for RPC). See Figure 2 for the corresponding nontargeted evaluation.

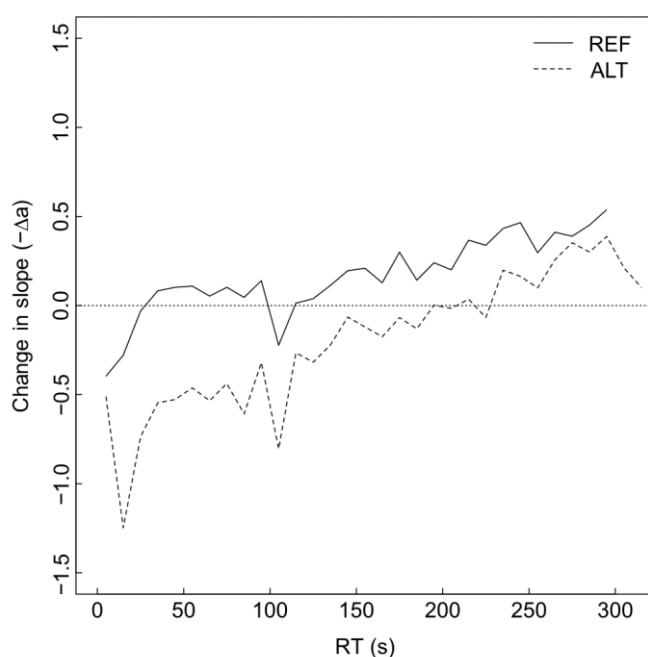

**Figure S3.** Evaluation of ion suppression based on nontargeted data for the complementary reversed phase (RPC) subset. See legend of Figure 3 for an explanation.

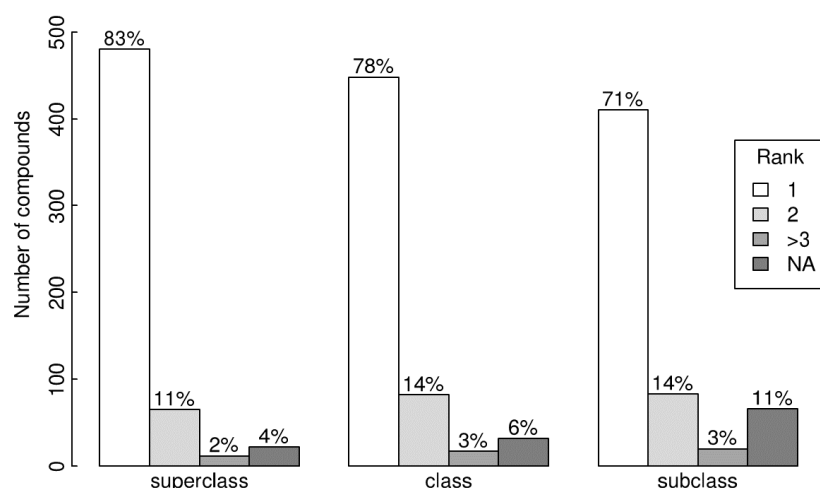

**Figure S4.** Test of chemical classification based on targeted data. Spectra of known metabolite standards ( $n = 578$ ) were annotated with MS-FINDER and classified with ClassyFire. The percentage of correct classification at the respective ontological level (“superclass”, “class”, “subclass”) is given. “Rank” refers to the scored metabolite IDs from MS-FINDER with ‘NA’ designating that no ID was in the correct class.

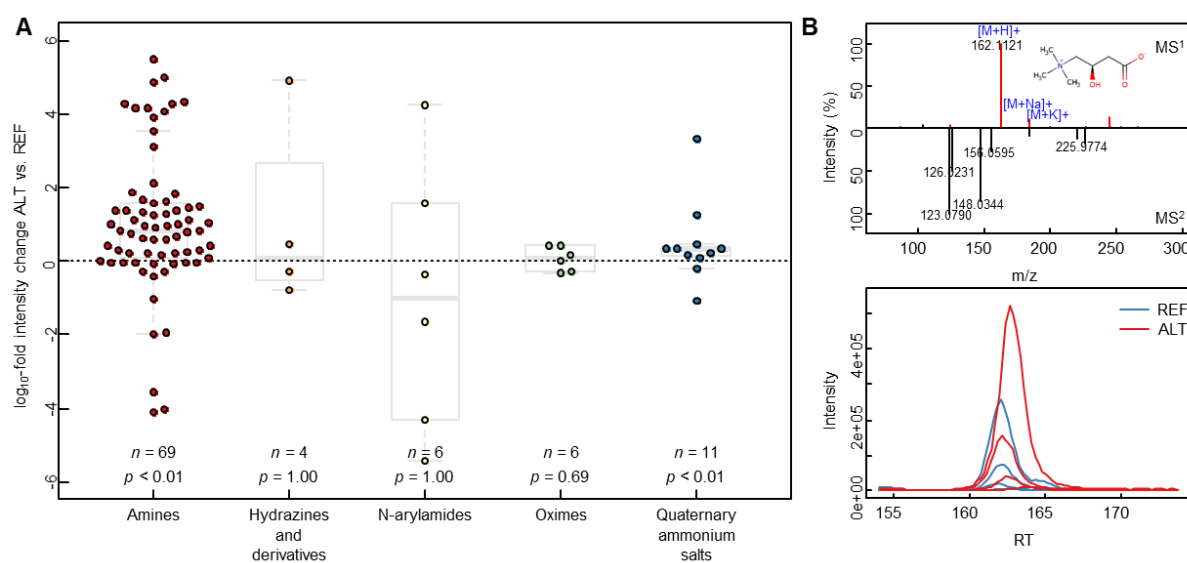

**Figure S5.** Exemplary changes in selectivity as detected by chemical classification of nontargeted data. (A) Change in analytical response ALT vs. REF setups for individual metabolites, color-coded by chemical subclass (superclass “Organic nitrogen compounds”). Metabolite counts and  $p$  values of a binomial test are given;  $p$  values  $< 0.05$  indicate significant changes. (B) Pseudospectrum and EICs for L-carnitine, as a sample quaternary ammonium compound.

## Supplementary Tables

**Table S1.** Chemical classification of the nontargeted dataset. Deconvoluted spectra were identified with MS-FINDER followed by chemical classification with ClassyFire. Columns summarize numbers (*n*) and feature intensities (*I*) summed by chemical class. REF/ALT: reference/alternative analytical setup; HILIC/RPC: chromatography method used.

| Chromatography method                     | HILIC    |              |                              |                            |                                  |          |              |                              |                            |                                  | RPC      |              |                              |                            |                                  |          |              |                              |                            |                                  |
|-------------------------------------------|----------|--------------|------------------------------|----------------------------|----------------------------------|----------|--------------|------------------------------|----------------------------|----------------------------------|----------|--------------|------------------------------|----------------------------|----------------------------------|----------|--------------|------------------------------|----------------------------|----------------------------------|
| Instrumental setup                        | REF      |              |                              |                            |                                  | ALT      |              |                              |                            |                                  | REF      |              |                              |                            |                                  | ALT      |              |                              |                            |                                  |
| Compound class                            | <i>n</i> | <i>n</i> (%) | <i>I</i> (×10 <sup>6</sup> ) | log <sub>10</sub> <i>I</i> | log <sub>10</sub> − <i>I</i> (%) | <i>n</i> | <i>n</i> (%) | <i>I</i> (×10 <sup>6</sup> ) | log <sub>10</sub> <i>I</i> | log <sub>10</sub> − <i>I</i> (%) | <i>n</i> | <i>n</i> (%) | <i>I</i> (×10 <sup>6</sup> ) | log <sub>10</sub> <i>I</i> | log <sub>10</sub> − <i>I</i> (%) | <i>n</i> | <i>n</i> (%) | <i>I</i> (×10 <sup>6</sup> ) | log <sub>10</sub> <i>I</i> | log <sub>10</sub> − <i>I</i> (%) |
| Alkaloids and derivatives                 | 6        | 1.1          | 0.9                          | 23.8                       | 1.1                              | 9        | 2.8          | 1                            | 38.3                       | 2.7                              | 7        | 1.6          | 0.2                          | 28.6                       | 1.6                              | 5        | 1.5          | 0.2                          | 22.2                       | 1.6                              |
| Benzenoids                                | 61       | 11.3         | 12.5                         | 262.1                      | 11.7                             | 40       | 12.2         | 18.9                         | 183.1                      | 12.9                             | 53       | 12.4         | 2.7                          | 219.6                      | 12.6                             | 32       | 9.6          | 1.4                          | 125.9                      | 9.1                              |
| Homogeneous non-metal compounds           | 1        | 0.2          | 0                            | 0                          | 0                                | 1        | 0.3          | 0                            | 0                          | 0                                | 0        | 0            | 0                            | 0                          | 0                                | 0        | 0            | 0                            | 0                          | 0                                |
| Hydrocarbons                              | 3        | 0.6          | 0                            | 10.2                       | 0.5                              | 0        | 0            | 0                            | 0                          | 0                                | 3        | 0.7          | 0.1                          | 10.3                       | 0.6                              | 0        | 0            | 0                            | 0                          | 0                                |
| Lignans, neolignans and related compounds | 1        | 0.2          | 0.1                          | 5                          | 0.2                              | 0        | 0            | 0                            | 0                          | 0                                | 2        | 0.5          | 0.2                          | 8.5                        | 0.5                              | 0        | 0            | 0                            | 0                          | 0                                |
| Lipids and lipid-like molecules           | 38       | 7            | 7.6                          | 168.2                      | 7.5                              | 21       | 6.4          | 6.3                          | 91.7                       | 6.5                              | 74       | 17.2         | 1.5                          | 280.9                      | 16.1                             | 39       | 11.7         | 5                            | 166.1                      | 12                               |
| Nucleosides, nucleotides, and analogues   | 16       | 3            | 1.1                          | 65.8                       | 2.9                              | 4        | 1.2          | 1.6                          | 20.5                       | 1.4                              | 6        | 1.4          | 0.1                          | 23.6                       | 1.4                              | 10       | 3            | 0.3                          | 42                         | 3                                |
| Organic 1,3-dipolar compounds             | 3        | 0.6          | 0.1                          | 12.5                       | 0.6                              | 0        | 0            | 0                            | 0                          | 0                                | 1        | 0.2          | 0                            | 3.6                        | 0.2                              | 0        | 0            | 0                            | 0                          | 0                                |
| Organic acids and derivatives             | 196      | 36.2         | 36                           | 844.1                      | 37.6                             | 93       | 28.4         | 37.8                         | 394.6                      | 27.9                             | 109      | 25.4         | 11                           | 456.2                      | 26.1                             | 97       | 29.1         | 6.5                          | 407.2                      | 29.4                             |
| Organic nitrogen compounds                | 27       | 5            | 4.5                          | 118.8                      | 5.3                              | 34       | 10.4         | 7.3                          | 143.5                      | 10.1                             | 9        | 2.1          | 0.2                          | 30.3                       | 1.7                              | 37       | 11.1         | 1.3                          | 145                        | 10.5                             |
| Organic oxygen compounds                  | 64       | 11.8         | 3.8                          | 247.3                      | 11                               | 29       | 8.9          | 6.2                          | 125.6                      | 8.9                              | 52       | 12.1         | 2.9                          | 211.6                      | 12.1                             | 50       | 15           | 2.2                          | 211.8                      | 15.3                             |
| Organoheterocyclic compounds              | 121      | 22.4         | 20.4                         | 470.9                      | 21                               | 87       | 26.6         | 20.4                         | 386.2                      | 27.3                             | 93       | 21.7         | 11                           | 397.1                      | 22.7                             | 56       | 16.8         | 2.4                          | 235.1                      | 17                               |
| Organosulfur compounds                    | 1        | 0.2          | 0                            | 4.1                        | 0.2                              | 3        | 0.9          | 0.2                          | 9.1                        | 0.6                              | 3        | 0.7          | 0.3                          | 13.4                       | 0.8                              | 1        | 0.3          | 0                            | 4.1                        | 0.3                              |
| Phenylpropanoids and polyketides          | 3        | 0.6          | 0.4                          | 12.8                       | 0.6                              | 6        | 1.8          | 0.7                          | 23.2                       | 1.6                              | 17       | 4            | 0.4                          | 65.5                       | 3.7                              | 6        | 1.8          | 0.1                          | 25.1                       | 1.8                              |
| Sum                                       | 541      | 100          | 87                           | 2246                       | 100                              | 327      | 100          | 100                          | 1416                       | 100                              | 429      | 100          | 31                           | 1749                       | 100                              | 333      | 100          | 19                           | 1385                       | 100                              |

**Table S2.** Composition of Pharmaceutical Mix 17 (Neochema, Germany) used as internal standard and for ion suppression assay.

| Substance                  | CAS no.    | Stock concentration<br>( $\mu\text{g mL}^{-1}$ ) | Final concentration<br>(internal standard;<br>$\mu\text{g mL}^{-1}$ ) | Working<br>concentration (ion<br>suppression assay;<br>$\mu\text{g mL}^{-1}$ ) |
|----------------------------|------------|--------------------------------------------------|-----------------------------------------------------------------------|--------------------------------------------------------------------------------|
| Atenolol                   | 29122-68-7 | 10                                               | 0.2                                                                   | 0.2                                                                            |
| Bezafibrate                | 41859-67-0 | 10                                               | 0.2                                                                   | 0.2                                                                            |
| Bisoprolol                 | 66722-44-9 | 10                                               | 0.2                                                                   | 0.2                                                                            |
| Carbamazepine              | 298-46-4   | 10                                               | 0.2                                                                   | 0.2                                                                            |
| Clofibric acid             | 882-09-7   | 10                                               | 0.2                                                                   | 0.2                                                                            |
| Diclofenac (free<br>acid)  | 15307-86-5 | 10                                               | 0.2                                                                   | 0.2                                                                            |
| Ibuprofen                  | 15687-27-1 | 10                                               | 0.2                                                                   | 0.2                                                                            |
| Ketoprofen                 | 22071-15-4 | 10                                               | 0.2                                                                   | 0.2                                                                            |
| Metoprolol                 | 51384-51-1 | 10                                               | 0.2                                                                   | 0.2                                                                            |
| Nadolol                    | 42200-33-9 | 10                                               | 0.2                                                                   | 0.2                                                                            |
| Naproxen                   | 22204-53-1 | 10                                               | 0.2                                                                   | 0.2                                                                            |
| Phenazone                  | 60-80-0    | 10                                               | 0.2                                                                   | 0.2                                                                            |
| Propranolol-HCl            | 318-98-9   | 10                                               | 0.2                                                                   | 0.2                                                                            |
| Propyphenazone             | 479-92-5   | 10                                               | 0.2                                                                   | 0.2                                                                            |
| Salbutamol                 | 18559-94-9 | 10                                               | 0.2                                                                   | 0.2                                                                            |
| Sotalol-HCl                | 959-24-0   | 10                                               | 0.2                                                                   | 0.2                                                                            |
| Terbutaline<br>hemisulfate | 23031-32-5 | 10                                               | 0.2                                                                   | 0.2                                                                            |
